# Supplementary material for: SOD-1 Variants in Amyotrophic Lateral Sclerosis: Systematic Re-Evaluation According to ACMG-AMP Guidelines
Source: MDPI journal article supplement (doi:10.3390/genes13030537), 2022-03-18
Supplement: s1 [file s1]

**Supplementary Table S4.** Characteristics of the *SOD1* variants relevant to the PVS1 criterion.

| <b>_Coding change<br/>(NM_000454.5)</b> | <b>Protein change<br/>(NP_000445.1)</b> | <b>Consequence Type</b> | <b>Predict/Not predict to undergo NMD</b> | <b>Location. Protein Position. Splice distance.</b>                                                       |
|-----------------------------------------|-----------------------------------------|-------------------------|-------------------------------------------|-----------------------------------------------------------------------------------------------------------|
| c.301G>T                                | p.Glu101Ter                             | stop gained             | Not predict to undergo NMD                | Nonsense mutation in exon 4, position 2 of 118. Protein position 101 of 155. Splice distance -57.         |
| c.380T>A                                | p.Leu127Ter                             | stop gained             | Not predict to undergo NMD                | Nonsense in exon 5, position 23 of 461. Protein position 127 of 155. Splice distance 23                   |
| c.441T>A                                | p.Cys147Ter                             | nonsense variant        | Not predict to undergo NMD                | Nonsense in exon 5, position 84 of 461. Protein position 147 of 155. Splice distance 84.                  |
| c.424G>T                                | p.Gly142Ter                             | stop gained             | Not predict to undergo NMD                | Nonsense in exon 5, position 67 of 461. Protein position 142 of 155. Splice distance 67.                  |
| c.383_384insACCC                        | p.Lys129ProfsTer6                       | frameshift variant      | Not predict to undergo NMD                | Frameshift variants in exon 5 before poistion 27 of 461. Protein position 128 of 155. Splice distance 27. |
| c.384_385insTGGG                        | p.Lys129TrpfsTer6                       | frameshift variant      | Not predict to undergo NMD                | Frameshift variants in exon 5 before poistion 28 of 461. Protein position 129 of 155. Splice distance 28. |
| c.409A>T                                | p.Lys137Ter                             | nonsense variant        | Not predict to undergo NMD                | Nonsense variant in exon 4, position 52 of 461. Protein position 137 of 155. Splice distance 52.          |
| c.275_276delAA                          | p.Lys92ArgfsTer9                        | frameshift variant      | Predict to undergo NMD                    | Frameshift variant in exon 4 position 36-37 of 118. Protein position 92 of 155. Splice distance 36        |
| c.320_321insT                           | p.Ser108LeufsTer15                      | frameshift variant      | Not predict to undergo NMD                | Frameshift variant in exon 4 before position 82 of 118. Protein position 107 of 155. Splice distance -38  |
| c.383_392dup                            | p.Asn132GlnfsTer5                       | frameshift variant      | Not predict to undergo NMD                | Frameshift variant in exon 5 position 36 of 461. Protein position 131 of 155. Splice distance 36          |
| c.335dup                                | p.Cys112TrpfsTer11                      | frameshift variant      | Not predict to undergo NMD                | Frameshit variant in exon 4 before position 97 of 118 Protein position 112 of 155. Splice distance -23,   |
