# Supplementary material for: SOD-1 Variants in Amyotrophic Lateral Sclerosis: Systematic Re-Evaluation According to ACMG-AMP Guidelines
Source: MDPI journal article supplement (doi:10.3390/genes13030537), 2022-03-18
Supplement: s1 [file s1]

**Supplementary Table S5.** List of *SOD1* variants and concordance/discordance between open databases and re-classification.

| Coding change<br>(NM_000454.5) | Protein change<br>(NP_000445.1) | Variant ID   | LOVD                             | ClinVar                                            | Re-classification      |
|--------------------------------|---------------------------------|--------------|----------------------------------|----------------------------------------------------|------------------------|
| c.59A>G                        | p.Asn20Ser                      | rs768029813  | Likely benign                    | Conflicting<br>interpretations<br>of pathogenicity | Uncertain significance |
| c.68A>T                        | p.Gln23Leu                      | rs1169198442 | Likely pathogenic<br>.Pathogenic | Likely pathogenic                                  | Likely pathogenic      |
| c.184G>C                       | p.Gly62Arg                      | rs1568810268 |                                  |                                                    | Likely pathogenic      |
| c.251A>T                       | p.Asp84Val                      |              |                                  |                                                    | Likely pathogenic      |
| c.14C>T                        | p.Ala5Val                       | rs121912442  |                                  | Pathogenic                                         | Pathogenic             |
| c.13G>A                        | p.Ala5Thr                       | rs121912444  |                                  | Pathogenic                                         | Pathogenic             |
| c.13G>T                        | p.Ala5Ser                       | rs121912444  |                                  | Pathogenic                                         | Pathogenic             |
| c.16G>T                        | p.Val6Leu                       | rs1568807314 |                                  |                                                    | Likely pathogenic      |
| c.23T>A                        | p.Val8Glu                       | rs1568807330 |                                  |                                                    | Likely pathogenic      |
| c.19T>A                        | p.Cys7Ser                       | rs1312702973 |                                  |                                                    | Likely pathogenic      |
| c.20G>A                        | p.Cys7Tyr                       | rs121912448  |                                  | Pathogenic                                         | Likely pathogenic      |
| c.26T>A                        | p.Leu9Gln                       | rs1568807342 | Likely pathogenic                |                                                    | Pathogenic             |
| c.25C>G                        | p.Leu9Val                       | rs1568807333 |                                  |                                                    | Pathogenic             |
| c.32G>C                        | p.Gly11Ala                      | rs1555836167 | Pathogenic                       |                                                    | Likely pathogenic      |
| c.31G>C                        | p.Gly11Arg                      | rs1568807350 |                                  |                                                    | Likely pathogenic      |
| c.34G>T                        | p.Asp12Tyr                      | rs762628133  |                                  |                                                    | Likely pathogenic      |
| c.203T>C                       | p.Leu68Pro                      | rs1568810289 |                                  |                                                    | Likely pathogenic      |
| c.217G>A                       | p.Gly73Ser                      | rs121912455  |                                  | Pathogenic                                         | Likely pathogenic      |
| c.255G>C                       | p.Leu85Phe                      | rs1315541036 |                                  | Pathogenic                                         | Pathogenic             |
| c.256G>A                       | p.Gly86Ser                      | rs121912436  |                                  | Pathogenic                                         | Pathogenic             |
| c.272A>C                       | p.Asp91Ala                      | rs80265967   | Uncertain<br>significance        | Conflicting<br>interpretations<br>of pathogenicity | Pathogenic             |
| c.281G>A                       | p.Gly94Asp                      | rs121912438  |                                  | Pathogenic                                         | Pathogenic             |
| c.340A>T                       | p.Ile114Phe                     | rs1568810780 |                                  |                                                    | Likely pathogenic      |
| c.435G>C                       | p.Leu145Phe                     | rs1482760341 | Pathogenic                       | Pathogenic                                         | Pathogenic             |
| c.449T>C                       | p.Ile150Thr                     | rs1424014997 | Pathogenic                       |                                                    | Likely pathogenic      |
| c.255G>T                       | p.Leu85Phe                      |              | Pathogenic                       |                                                    | Pathogenic             |
| c.256G>C                       | p.Gly86Arg                      | rs121912436  |                                  | Pathogenic                                         | Pathogenic             |
| c.37G>C                        | p.Gly13Arg                      | rs121912456  |                                  | Pathogenic                                         | Likely pathogenic      |
| c.43G>A                        | p.Val15Met                      | rs1568807400 |                                  | Likely pathogenic                                  | Likely pathogenic      |
| c.44T>C                        | p.Val15Ala                      | rs1202989817 |                                  |                                                    | Likely pathogenic      |
| c.50G>C                        | p.Gly17Ala                      | rs1200906022 |                                  | Pathogenic/<br>Likely pathogenic                   | Likely pathogenic      |
| c.49G>A                        | p.Gly17Ser                      | rs121912453  |                                  | Pathogenic                                         | Likely pathogenic      |
| c.62T>G                        | p.Phe21Cys                      | rs1555836169 |                                  |                                                    | Likely pathogenic      |

|          |            |              |                   |                                  |                        |
|----------|------------|--------------|-------------------|----------------------------------|------------------------|
| c.64G>A  | p.Glu22Lys | rs121912450  |                   | Pathogenic                       | Likely pathogenic      |
| c.65A>G  | p.Glu22Gly | rs1568807435 |                   |                                  | Likely pathogenic      |
| c.89T>C  | p.Val30Ala | rs1568809118 |                   |                                  | Uncertain Significance |
| c.112G>A | p.Gly38Arg | rs121912431  |                   | Pathogenic                       | Pathogenic             |
| c.116T>A | p.Leu39Gln | rs1555836520 |                   |                                  | Likely pathogenic      |
| c.115C>G | p.Leu39Val | rs121912432  |                   | Likely pathogenic                | Likely pathogenic      |
| c.124G>A | p.Gly42Ser | rs121912433  |                   | Pathogenic                       | Likely pathogenic      |
| c.125G>A | p.Gly42Asp | rs121912434  |                   | Pathogenic                       | Likely pathogenic      |
| c.131A>G | p.His44Arg | rs121912435  |                   | Pathogenic                       | Likely pathogenic      |
| c.137T>C | p.Phe46Ser | rs121912457  |                   | Pathogenic                       | Likely pathogenic      |
| c.140A>G | p.His47Arg | rs121912443  | Pathogenic        | Pathogenic                       | Pathogenic             |
| c.142G>T | p.Val48Phe | rs1555836523 | Pathogenic        |                                  | Likely pathogenic      |
| c.143T>C | p.Val48Ala | rs1568809169 |                   | Uncertain significance           | Likely pathogenic      |
| c.146A>G | p.His49Arg | rs1568809172 | Pathogenic        | Likely pathogenic                | Likely pathogenic      |
| c.147T>G | p.His49Gln | rs1568809175 |                   |                                  | Likely pathogenic      |
| c.148G>A | p.Glu50Lys | rs1568809178 |                   | Uncertain significance           | Pathogenic             |
| c.164C>G | p.Thr55Arg | rs986277034  |                   |                                  | Likely pathogenic      |
| c.179G>A | p.Ser60Asn | rs1413388444 |                   |                                  | Uncertain Significant  |
| c.197A>G | p.Asn66Ser | rs1568810275 |                   |                                  | Likely pathogenic      |
| c.199C>G | p.Pro67Ala | rs1356474292 |                   |                                  | Likely pathogenic      |
| c.229G>T | p.Asp77Tyr | rs1601157750 |                   | Likely pathogenic                | Likely pathogenic      |
| c.230A>T | p.Asp77Val | rs1568810316 |                   | Likely pathogenic                | Likely pathogenic      |
| c.263T>C | p.Val88Ala | rs1339283341 |                   | Likely pathogenic                | Pathogenic             |
| c.262G>A | p.Val88Met | rs1568810641 |                   | Likely pathogenic                | Pathogenic             |
| c.260A>G | p.Asn87Ser | rs11556620   |                   | Pathogenic/<br>Likely pathogenic | Pathogenic             |
| c.260A>T | p.Asn87Ile | rs11556620   |                   |                                  | Likely pathogenic      |
| c.259A>G | p.Asn87Asp | rs1555836792 |                   |                                  | Likely pathogenic      |
| c.261T>A | p.Asn87Lys | rs1555836793 |                   |                                  | Likely pathogenic      |
| c.268G>A | p.Ala90Thr | rs1568810660 |                   | Likely pathogenic                | Pathogenic             |
| c.269C>T | p.Ala90Val | rs1280042397 | Likely pathogenic |                                  | Pathogenic             |
| c.281G>C | p.Gly94Ala | rs121912438  |                   | Pathogenic                       | Pathogenic             |
| c.280G>A | p.Gly94Ser | rs121912437  |                   |                                  | Pathogenic             |
| c.280G>T | p.Gly94Cys | rs121912437  |                   | Likely pathogenic                | Pathogenic             |
| c.280G>C | p.Gly94Arg | rs121912437  |                   | Pathogenic                       | Pathogenic             |
| c.286G>A | p.Ala96Thr | rs1568810686 |                   |                                  | Likely pathogenic      |
| c.287C>G | p.Ala96Gly | rs1568810690 |                   |                                  | Likely pathogenic      |
| c.289G>A | p.Asp97Asn | rs121912459  |                   | Uncertain significance           | Likely pathogenic      |
| c.290A>T | p.Asp97Val | rs1555836803 |                   | Likely pathogenic                | Likely pathogenic      |
| c.292G>A | p.Val98Met | rs1555836806 |                   |                                  | Likely pathogenic      |
| c.292G>C | p.Val98Leu | rs1555836806 |                   |                                  | Likely pathogenic      |

|          |             |              |                        |                                                                                        |                        |
|----------|-------------|--------------|------------------------|----------------------------------------------------------------------------------------|------------------------|
| c.298A>G | p.Ile100Val | rs760740095  | Uncertain significance |                                                                                        | Uncertain significance |
| c.302A>G | p.Glu101Gly | rs121912439  |                        | Likely pathogenic                                                                      | Pathogenic             |
| c.242A>G | p.His81Arg  | rs121912458  |                        | Pathogenic                                                                             | Likely pathogenic      |
| c.253T>G | p.Leu85Val  | rs121912452  |                        | Pathogenic                                                                             | Pathogenic             |
| c.301G>A | p.Glu101Lys | rs76731700   |                        | Pathogenic/<br>Likely pathogenic                                                       | Pathogenic             |
| c.301G>T | p.Glu101Ter | rs76731700   |                        | Pathogenic                                                                             | Likely pathogenic      |
| c.313A>T | p.Ile105Phe | rs121912445  |                        | Pathogenic                                                                             | Likely pathogenic      |
| c.305A>G | p.Asp102Gly | rs1568810721 |                        |                                                                                        | Pathogenic             |
| c.304G>A | p.Asp102Asn | rs1568810715 |                        | Likely pathogenic                                                                      | Pathogenic             |
| c.304G>C | p.Asp102His | rs1568810715 |                        | Likely pathogenic                                                                      | Pathogenic             |
| c.317C>T | p.Ser106Leu | rs1378590183 |                        | Pathogenic                                                                             | Likely pathogenic      |
| c.319C>G | p.Leu107Val | rs121912440  |                        | Pathogenic                                                                             | Likely pathogenic      |
| c.319C>T | p.Leu107Phe | rs121912440  |                        | Uncertain significance                                                                 | Likely pathogenic      |
| c.326G>A | p.Gly109Glu | rs1359299834 |                        |                                                                                        | Likely pathogenic      |
| c.338T>C | p.Ile113Thr | rs74315452   |                        | Likely pathogenic                                                                      | Pathogenic             |
| c.339C>G | p.Ile113Met | rs1299542356 |                        |                                                                                        | Likely pathogenic      |
| c.344G>C | p.Gly115Ala | rs1568810789 |                        |                                                                                        | Likely pathogenic      |
| c.346C>G | p.Arg116Gly | rs1301635320 |                        | Pathogenic                                                                             | Likely pathogenic      |
| c.352C>G | p.Leu118Val | rs199474723  |                        | Conflicting interpretations of pathogenicity. Likely pathogenic;Uncertain significance | Likely Pathogenic      |
| c.355G>C | p.Val119Leu | rs1235629842 |                        | Uncertain significance                                                                 | Pathogenic             |
| c.374A>C | p.Asp125Ala | rs1568811366 |                        | Uncertain significance                                                                 | Likely pathogenic      |
| c.374A>T | p.Asp125Val | rs1568811366 |                        |                                                                                        | Likely pathogenic      |
| c.376G>C | p.Asp126His | rs1568811372 |                        | Likely pathogenic                                                                      | Likely pathogenic      |
| c.380T>A | p.Leu127Ter | rs121912454  |                        | Pathogenic                                                                             | Pathogenic             |
| c.382G>C | p.Gly128Arg | rs1568811389 |                        |                                                                                        | Likely pathogenic      |
| c.401A>T | p.Glu134Val | rs1568811426 |                        |                                                                                        | Likely pathogenic      |
| c.404G>A | p.Ser135Asn | rs121912451  |                        | Pathogenic                                                                             | Likely pathogenic      |
| c.413C>G | p.Thr138Arg | rs1568811454 |                        |                                                                                        | Likely pathogenic      |
| c.416G>A | p.Gly139Glu | rs1568811464 |                        | Uncertain significance                                                                 | Likely pathogenic      |
| c.418A>C | p.Asn140His | rs1568811471 |                        |                                                                                        | Likely pathogenic      |
| c.420C>A | p.Asn140Lys | rs1804449    |                        | Pathogenic                                                                             | Pathogenic             |
| c.422C>G | p.Ala141Gly | rs1555836937 |                        | Uncertain significance                                                                 | Likely pathogenic      |
| c.425G>A | p.Gly142Glu | rs1568811489 |                        |                                                                                        | Likely pathogenic      |
| c.434T>C | p.Leu145Ser | rs121912446  |                        | Likely pathogenic                                                                      | Pathogenic             |
| c.436G>A | p.Ala146Thr | rs121912447  |                        | Likely pathogenic                                                                      | Pathogenic             |

|                   |                     |              |            |                                                                                       |                        |
|-------------------|---------------------|--------------|------------|---------------------------------------------------------------------------------------|------------------------|
| c.437C>A          | p.Ala146Asp         | rs1131690781 |            | Likely pathogenic                                                                     | Pathogenic             |
| c.439T>C          | p.Cys147Arg         | rs1568811515 |            |                                                                                       | Pathogenic             |
| c.443G>A          | p.Gly148Asp         | rs1555836950 |            | Likely pathogenic                                                                     | Pathogenic             |
| c.442G>C          | p.Gly148Arg         | rs1568811520 |            | Likely pathogenic                                                                     | Pathogenic             |
| c.445G>A          | p.Val149Ile         | rs567511139  |            |                                                                                       | Likely pathogenic      |
| c.446T>G          | p.Val149Gly         | rs1476760624 |            | Likely pathogenic                                                                     | Likely pathogenic      |
| c.455T>C          | p.Ile152Thr         | rs121912449  |            | Pathogenic                                                                            | Likely pathogenic      |
| c.455T>G          | p.Ile152Ser         |              |            | Uncertain significance                                                                | Likely pathogenic      |
| c.437C>G          | p.Ala146Gly         | rs1131690781 |            | Likely pathogenic                                                                     | Likely pathogenic      |
| c.13_14delGCinsTT | p.Ala5Phe           |              |            |                                                                                       | Likely pathogenic      |
| c.287C>T          | p.Ala96Val          | rs1568810690 |            |                                                                                       | Likely pathogenic      |
| c.335G>A          | p.Cys112Tyr         | rs1601158483 |            |                                                                                       | Likely pathogenic      |
| c.441T>A          | p.Cys147Ter         |              |            |                                                                                       | Pathogenic             |
| c.172T>C          | p.Cys58Arg          | rs1568810255 |            |                                                                                       | Uncertain Significant  |
| c.19T>G           | p.Cys7Gly           | rs1312702973 |            |                                                                                       | Likely pathogenic      |
| c.21C>G           | p.Cys7Trp           |              | Pathogenic |                                                                                       | Likely pathogenic      |
| c.304G>T          | p.Asp102Ty          | rs1568810715 |            |                                                                                       | Likely pathogenic      |
| c.328G>T          | p.Asp110Tyr         | rs567432143  |            | Uncertain significance                                                                | Uncertain significance |
| c.35A>C           | p.Asp12Ala          | rs1568807374 |            |                                                                                       | Uncertain significance |
| c.251A>G          | p.Asp84Gly          | rs1568810615 |            |                                                                                       | Likely pathogenic      |
| c.250G>A          | p.Asp84Asn          | rs1555836789 |            |                                                                                       | Likely pathogenic      |
| c.272A>T          | p.Asp91Val          | rs80265967   |            | Conflicting interpretations of pathogenicity                                          | Pathogenic             |
| c.271G>A          | p.Asp91Asn          | rs1343616996 |            |                                                                                       | Likely pathogenic      |
| c.272_274dupACA   | p.Asp91_Lys92insAsn |              |            |                                                                                       | Likely pathogenic      |
| c.400G>A          | p.Glu134Lys         |              |            |                                                                                       | Likely pathogenic      |
| c.122A>G          | p.Glu41Gly          | rs1568809149 |            | Conflicting interpretations of pathogenicity.Likely pathogenic;Uncertain significance | Likely pathogenic      |
| c.63C>G           | p.Phe21Leu          | rs1555836170 |            | Uncertain significance                                                                | Likely pathogenic      |
| c.137T>G          | p.Phe46Cys          | rs121912457  |            | Pathogenic                                                                            | Likely pathogenic      |
| c.193T>C          | p.Phe65Leu          | rs1030039318 |            |                                                                                       | Likely pathogenic      |
| c.326G>T          | p.Gly109Val         | rs1359299834 |            |                                                                                       | Pathogenic             |
| c.425G>C          | p.Gly142Ala         | rs1568811489 |            |                                                                                       | Likely pathogenic      |
| c.424G>T          | p.Gly142Ter         | rs1319062081 |            |                                                                                       | Pathogenic             |
| c.424G>A          | p.Gly142Arg         |              |            |                                                                                       | Likely pathogenic      |
| c.442G>A          | p.Gly148Ser         |              |            |                                                                                       | Likely pathogenic      |
| c.442G>T          | p.Gly148Cys         |              |            |                                                                                       | Likely pathogenic      |

|                  |                    |              |                   |                                                                                        |                        |
|------------------|--------------------|--------------|-------------------|----------------------------------------------------------------------------------------|------------------------|
| c.113G>T         | p.Gly38Val         | rs1555836517 |                   |                                                                                        | Likely pathogenic      |
| c.217G>T         | p.Gly73Cys         | rs121912455  |                   | Pathogenic                                                                             | Likely pathogenic      |
| c.218G>A         | p.Gly73Asp         |              |                   |                                                                                        | Likely pathogenic      |
| c.362A>T         | p.His121Leu        | rs1410925719 |                   |                                                                                        | Likely pathogenic      |
| c.139C>G         | p.His47Asp         | rs748897491  |                   |                                                                                        | Likely pathogenic      |
| c.341T>C         | p.Ile114Thr        | rs121912441  |                   | Pathogenic                                                                             | Likely pathogenic      |
| c.448A>G         | p.Ile150Val        | rs1169917994 |                   |                                                                                        | Likely pathogenic      |
| c.56_58delTCA    | p.Ile19del         |              |                   |                                                                                        | Likely pathogenic      |
| c.383_384insACCC | p.Lys129ProfsTer6  |              |                   |                                                                                        | Pathogenic             |
| c.384_385insTGGG | p.Lys129TrpfsTer6  |              |                   |                                                                                        | Pathogenic             |
| c.409A>T         | p.Lys137Ter        | rs1555836934 |                   |                                                                                        | Pathogenic             |
| c.275_276delAA   | p.Lys92ArgfsTer9   |              |                   |                                                                                        | Pathogenic             |
| c.380T>C         | p.Leu127Ser        | rs121912454  |                   | Pathogenic                                                                             | Likely pathogenic      |
| c.116T>G         | p.Leu39Arg         | rs1555836520 |                   |                                                                                        | Likely pathogenic      |
| c.203T>G         | p.Leu68Arg         | rs1568810289 |                   |                                                                                        | Pathogenic             |
| c.418A>G         | p.Asn140Asp        | rs1568811471 |                   |                                                                                        | Likely pathogenic      |
| c.200C>G         | p.Pro67Arg         | rs1568810284 |                   |                                                                                        | Likely pathogenic      |
| c.199C>T         | p.Pro67Ser         | rs1356474292 |                   |                                                                                        | Likely pathogenic      |
| c.69G>C          | p.Gln23His         | rs1424217272 |                   |                                                                                        | Likely pathogenic      |
| c.68A>G          | p.Gln23Arg         | rs1169198442 |                   | Likely pathogenic                                                                      | Likely pathogenic      |
| c.346C>T         | p.Arg116Cys        | rs1301635320 | Likely pathogenic | Pathogenic                                                                             | Likely pathogenic      |
| c.320_321insT    | p.Ser108LeufsTer15 |              |                   | Pathogenic                                                                             | Pathogenic             |
| c.404G>C         | p.Ser135Thr        | rs121912451  | Pathogenic        | Pathogenic                                                                             | Likely pathogenic      |
| c.179G>T         | p.Ser60Ile         | rs1413388444 |                   |                                                                                        | Uncertain Significant  |
| c.240-7T>G       |                    | rs1568810602 |                   |                                                                                        | Uncertain significance |
| c.358-11A>G      |                    | rs369600566  |                   | Pathogenic                                                                             | Uncertain significance |
| c.358-304C>G     |                    | rs1555836889 |                   |                                                                                        | Uncertain significance |
| c.350C>G         | p.Thr117Arg        | rs1568810800 |                   |                                                                                        | Likely pathogenic      |
| c.412A>G         | p.Thr138Ala        | rs1568811445 |                   | Conflicting interpretations of pathogenicity. Likely pathogenic;Uncertain significance | Likely pathogenic      |
| c.355G>T         | p.Val119Leu        | rs1235629842 |                   | Uncertain significance                                                                 | Likely pathogenic      |
| c.355G>A         | p.Val119Met        |              |                   |                                                                                        | Likely pathogenic      |
| c.358G>T         | p.Val120Phe        |              |                   |                                                                                        | Likely pathogenic      |
| c.446T>C         | p.Val149Ala        |              |                   |                                                                                        | Likely pathogenic      |
| c.44T>G          | p.Val15Gly         | rs1202989817 |                   |                                                                                        | Likely pathogenic      |
| c.95T>C          | p.Val32Ala         | rs1428716759 |                   | Conflicting interpretations of pathogenicity. Likely                                   | Likely pathogenic      |

|              |                    |              |                                  |                                    |                        |
|--------------|--------------------|--------------|----------------------------------|------------------------------------|------------------------|
|              |                    |              |                                  | pathogenic. Uncertain significance |                        |
| c.284T>C     | p.Val95Ala         | rs202198235  |                                  |                                    | Likely pathogenic      |
| c.95T>G      | p.Val32Gly         | rs1428716759 |                                  |                                    | Likely pathogenic      |
| c.112G>C     | p.Gly38Arg         | rs121912431  |                                  | Pathogenic                         | Pathogenic             |
| c.116T>C     | p.Leu39Pro         |              |                                  |                                    | Likely pathogenic      |
| c.66G>C      | p.Glu22Asp         |              |                                  |                                    | Likely pathogenic      |
| c.172T>G     | p.Cys58Gly         |              |                                  |                                    | Uncertain Significant  |
| c.199G>C     | p.Pro67Ala         | rs1356474292 |                                  |                                    | Likely pathogenic      |
| c.215A>C     | p.His72Pro         |              |                                  |                                    | Likely pathogenic      |
| c.223C>T     | p.Pro75Ser         |              |                                  |                                    | Likely pathogenic      |
| c.224C>G     | p.Pro75Arg         |              |                                  |                                    | Likely pathogenic      |
| c.230A>G     | p.Asp77Gly         |              |                                  |                                    | Likely pathogenic      |
| c.358G>C     | p.Val120Leu        | rs1457889952 |                                  |                                    | Likely pathogenic      |
| c.301G>C     | p.Glu101Gln        |              |                                  |                                    | Likely pathogenic      |
| c.403A>G     | p.Ser135Gly        | rs1555836932 |                                  |                                    | Likely pathogenic      |
| c.361C>A     | p.His121Asn        |              |                                  |                                    | Likely pathogenic      |
| c.385A>G     | p.Lys129Glu        |              |                                  |                                    | Likely pathogenic      |
| c.457G>A     | p.Ala153Thr        | rs747094021  |                                  | Uncertain significance             | Likely pathogenic      |
| c.123A>T     | p.Glu41Asp         |              |                                  |                                    | Likely pathogenic      |
| c.383_392dup | p.Asn132GlnfsTer5  |              | Likely pathogenic.<br>Pathogenic |                                    | Pathogenic             |
| c.335dup     | p.Cys112TrpfsTer11 | rs1568810771 |                                  | Likely pathogenic                  | Pathogenic             |
| c.358-10T>G  |                    | rs1197141604 |                                  | Uncertain significance             | Uncertain significance |
| c.377A>C     |                    | rs1164911383 |                                  | Likely pathogenic                  | Likely pathogenic      |
| c.241C>T     | p.His81Tyr         |              |                                  |                                    | Likely pathogenic      |
| c.376G>A     | p.Asp126Asn        |              |                                  |                                    | Likely pathogenic      |
