# Supplementary material for: SOD-1 Variants in Amyotrophic Lateral Sclerosis: Systematic Re-Evaluation According to ACMG-AMP Guidelines
Source: MDPI journal article supplement (doi:10.3390/genes13030537), 2022-03-18
Supplement: s1 [file s1]

**Supplementary Table S3.** List of *in vivo* and *in vitro* functional studies considered for the PS3 criterion attribution.

| <p style="text-align: center;"><b><i>In vivo</i></b> functional studies</p> <p style="text-align: center;">[transgenic mouse, Zebrafish, D. Melanogaster, rat, C. elegans]</p> |      |          |                             |           |
|--------------------------------------------------------------------------------------------------------------------------------------------------------------------------------|------|----------|-----------------------------|-----------|
| Protein change<br>(NP_000445.1)                                                                                                                                                |      | PMID     | Author's                    | Reference |
| p.Gly94Ala                                                                                                                                                                     | G94A | 11717358 | Nagai et al., 2001          | 39        |
|                                                                                                                                                                                |      | 31771229 | Li et al., 2019             | 40        |
|                                                                                                                                                                                |      | 33921446 | Liguori et al., 2021        | 41        |
|                                                                                                                                                                                |      | 34830115 | Bonifacino et al., 2021     | 31        |
| p.His47Arg                                                                                                                                                                     | H47R | 17549011 | Sasaki, et al., 2007        | 42        |
|                                                                                                                                                                                |      | 34830115 | Bonifacino et al., 2021     | 31        |
|                                                                                                                                                                                |      | 11717358 | Nagai et al., 2001          | 39        |
| p.Asp91Val                                                                                                                                                                     | D91A | 17146286 | Jonsson et al., 2006        | 43        |
|                                                                                                                                                                                |      | 33921446 | Liguori et al., 2021        | 41        |
| p.Ala5Val                                                                                                                                                                      | A5V  | 33921446 | Liguori et al., 2021        | 41        |
| p.Ala5Thr                                                                                                                                                                      | A5T  | 22745481 | Hsueh-Ning Liu et al., 2012 | 44        |
| p.Leu85Val                                                                                                                                                                     | L85V | 33921446 | Liguori et al., 2021        | 41        |
| p.Gly86Arg                                                                                                                                                                     | G86R | 34830115 | Bonifacino et al., 2021     | 31        |
|                                                                                                                                                                                |      | 30296255 | Baskoylu et al., 2018       | 45        |
|                                                                                                                                                                                |      | 9052802  | Bruijn et al., 1997         | 46        |
|                                                                                                                                                                                |      | 27974499 | Şahin et al., 2017          | 47        |
| p.Gly38Arg                                                                                                                                                                     | G38R | 34830115 | Bonifacino et al., 2021     | 31        |
|                                                                                                                                                                                |      | 27974499 | Şahin et al., 2017          | 47        |
|                                                                                                                                                                                |      | 19660548 | Witan et al., 2009          | 48        |
| p.Gly94Arg                                                                                                                                                                     | G94R | 34830115 | Bonifacino et al., 2021     | 31        |
|                                                                                                                                                                                |      | 20504969 | Ramesh et al., 2010         | 49        |
| p.Asp83Gly                                                                                                                                                                     | D83G | 34830115 | Bonifacino et al., 2021     | 31        |

***In vitro*** functional studies  
[Fibroblast, NSC34, N2a, EC293FT, iPSC]

| Protein change<br>(NP_000445.1) |       | PMID     | Author's               | Reference |
|---------------------------------|-------|----------|------------------------|-----------|
| p.Gly94Ala                      | G94A  | 26919046 | Keskin et al., 2016    | 50        |
|                                 |       | 30887850 | Lin et al., 2019       | 51        |
|                                 |       | 19483195 | Prudencio et al., 2009 | 52        |
| p.His47Arg                      | H47R  | 26919046 | Keskin et al., 2016    | 50        |
|                                 |       | 18006498 | Cozzolino et al., 2008 | 54        |
| p.Asp91Val                      | D91A  | 26919046 | Keskin et al., 2016    | 61        |
|                                 |       | 30550341 | Walczak et al., 2019   | 54        |
|                                 |       | 19483195 | Prudencio et al., 2009 | 52        |
| p.Ala5Val                       | A5V   | 26919046 | Keskin et al., 2016    | 50        |
|                                 |       | 30887850 | Lin et al., 2019       | 51        |
|                                 |       | 19483195 | Prudencio et al., 2009 | 52        |
| p.Ala5Thr                       | A5T   | 19483195 | Prudencio et al., 2009 | 52        |
| p.Leu85Val                      | L85V  | 19483195 | Prudencio et al., 2009 | 52        |
| p.Gly86Arg                      | G86R  | 20962037 | Wang et al., 2011      | 55        |
| p.Gly94Arg                      | G94R  | 19483195 | Prudencio et al., 2009 | 52        |
|                                 |       | 18552350 | Furukawa et al., 2008  | 58        |
| p.Glu101Lys                     | E101K | 19483195 | Prudencio et al., 2009 | 52        |
|                                 |       | 25600987 | Salehi et al., 2015    | 59        |
| p.Asn140Lys                     | N140K | 19483195 | Prudencio et al., 2009 | 52        |
| p.Cys147Arg                     | C147R | 18006498 | Cozzolino et al., 2008 | 53        |
| p.Val149Gly                     | V149G | 19483195 | Prudencio et al., 2009 | 52        |
|                                 |       | 24253732 | McAlary et al., 2013   | 60        |

|             |       |          |                         |    |
|-------------|-------|----------|-------------------------|----|
|             |       | 27867347 | McAlary et al., 2016    | 61 |
| p.Leu39Arg  | L39R  | 32676988 | Rajpurohit et al., 2020 | 62 |
|             |       | 28463106 | Zhong et al., 2017      | 63 |
| p.Val15Gly  | V15G  | 19483195 | Prudencio et al., 2009  | 52 |
| p.Ile114Thr | I114T | 24439480 | Allen et al., 2014      | 57 |
| p.Gly94Asp  | G94D  | 19483195 | Prudencio et al., 2009  | 52 |
| p.Gly94Ser  | G94S  | 19483195 | Prudencio et al., 2009  | 52 |
| p.Asp125Val | D125V | 19483195 | Prudencio et al., 2009  | 52 |
| p.Val15Met  | V15M  | 19483195 | Prudencio et al., 2009  | 52 |
| p.Glu22Gly  | E22G  | 19483195 | Prudencio et al., 2009  | 52 |
| p.Glu22Lys  | E22K  | 19483195 | Prudencio et al., 2009  | 52 |
| p.Gly42Asp  | G42D  | 19483195 | Prudencio et al., 2009  | 52 |
| p.Glu101Gly | E101G | 19483195 | Prudencio et al., 2009  | 52 |
| p.Leu145Phe | L145F | 19483195 | Prudencio et al., 2009  | 52 |
| p.Gly42Ser  | G42S  | 19483195 | Prudencio et al., 2009  | 52 |
| p.Asp102Gly | D102G | 19483195 | Prudencio et al., 2009  | 52 |
| p.Leu145Ser | L145S | 19483195 | Prudencio et al., 2009  | 52 |
| p.Asn87Ser  | N87S  | 26919046 | Keskin et al., 2016     | 50 |
| p.Leu118Val | L118V | 26919046 | Keskin et al., 2016     | 50 |
| p.Pro75Ser  | P75S  | 30887850 | Lin et al., 2019        | 51 |
