# Supplementary material for: SOD-1 Variants in Amyotrophic Lateral Sclerosis: Systematic Re-Evaluation According to ACMG-AMP Guidelines
Source: MDPI journal article supplement (doi:10.3390/genes13030537), 2022-03-18
Supplement: s1 [file s1]

**Supplementary Table S1.** The ACMG-AMP criteria and their relevance in ALS.

| Acronym | Ranks of pathogenicity impact evidence | Criteria                                                                                                                                                                                                  | Relevance in ALS* |
|---------|----------------------------------------|-----------------------------------------------------------------------------------------------------------------------------------------------------------------------------------------------------------|-------------------|
| PVS1    | Very strong                            | Null variant (nonsense, frameshift, canonical +/-1 or 2 splice sites, initiation codon, single or multi-exon deletion) in a gene where loss of function (LOF) is a known mechanism of disease             | ↑↑                |
| PS1     | Strong                                 | Same amino acid change as a previously established pathogenic variant regardless of nucleotide change                                                                                                     | ↑↑                |
| PS2     | Strong                                 | De novo (both maternity and paternity confirmed) in a patient with the disease and no family history                                                                                                      | ↑                 |
| PS3     | Strong                                 | Well-established in vitro or in vivo functional studies supportive of a damaging effect on the gene or gene product                                                                                       | ↑                 |
| PS4     | Strong                                 | The prevalence of the variant in affected individuals is significantly increased compared to the prevalence in controls                                                                                   | ↑↑                |
| PM1     | Moderate                               | Located in a mutational hot spot and/or critical and well-established functional domain (e.g. active site of an enzyme) without benign variation                                                          | ↑↑                |
| PM2     | Moderate                               | Absent from controls (or at extremely low frequency if recessive) in Exome Sequencing Project, 1000 Genomes or ExAC Caveat: Population data for indels may be poorly called by next sequencing generation | ↑                 |
| PM3     | Moderate                               | For recessive disorders, detected in trans with a pathogenic variant                                                                                                                                      | ↑                 |
| PM4     | Moderate                               | Protein length changes due to in-frame deletions/insertions in a non-repeat region or stop-loss variants                                                                                                  | ↑                 |
| PM5     | Moderate                               | Novel missense change at an amino acid residue where a different missense change determined to be pathogenic has been seen before                                                                         | ↑↑                |
| PM6     | Moderate                               | Assumed de novo, but without confirmation of paternity and maternity                                                                                                                                      | ↑                 |
| PP1     | Supporting                             | Co-segregation with disease in multiple affected family members in a gene definitively known to cause the disease                                                                                         | ↑↑                |
| PP2     | Supporting                             | Missense variant in a gene that has a low rate of benign missense variation and where missense variants are a common mechanism of disease                                                                 | ↑↑                |
| PP3     | Supporting                             | Multiple lines of computational evidence support a deleterious effect on the gene or gene product (conservation, evolutionary, splicing impact, etc)                                                      | ↑↑                |
| PP4     | Supporting                             | Patient's phenotype or family history is highly specific for a disease with a single genetic etiology                                                                                                     | ↑                 |
| PP5     | Supporting                             | Reputable source recently reports variant as pathogenic but the evidence is not available to the laboratory to perform an independent evaluation                                                          | ↑↑                |
| Acronym | Ranks of benign impact evidence        | Criteria                                                                                                                                                                                                  | Relevance in ALS  |
| BA1     | Stand-Alone                            | Allele frequency is above 5% in Exome Sequencing Project, 1000 Genomes, or ExAC                                                                                                                           | ↑↑                |
| BS1     | Strong                                 | Allele frequency is greater than expected for disorder                                                                                                                                                    | ↑↑                |
| BS2     | Strong                                 | Observed in a healthy adult individual for a recessive (homozygous), dominant (heterozygous), or X-linked (hemizygous) disorder with full penetrance expected at an early age                             | X                 |
| BS3     | Strong                                 | Well-established in vitro or in vivo functional studies shows no damaging effect on protein function or splicing                                                                                          | ↑                 |
| BS4     | Strong                                 | Lack of segregation in affected members of a family                                                                                                                                                       | ↑/X               |
| BP1     | Supporting                             | Missense variant in a gene for which primarily truncating variants are known to cause disease                                                                                                             | X                 |
| BP2     | Supporting                             | Observed in trans with a pathogenic variant for a fully penetrant dominant gene/disorder; or observed in cis with a pathogenic variant in any inheritance pattern                                         | ↑/X               |

|            |            |                                                                                                                                                                                                            |    |
|------------|------------|------------------------------------------------------------------------------------------------------------------------------------------------------------------------------------------------------------|----|
| <b>BP3</b> | Supporting | In-frame deletions/insertions in a repetitive region without a known function                                                                                                                              | X  |
| <b>BP4</b> | Supporting | Multiple lines of computational evidence suggest no impact on gene or gene product (conservation, evolutionary, splicing impact, etc)                                                                      | ↑↑ |
| <b>BP5</b> | Supporting | Variant found in a case with an alternate molecular basis for disease                                                                                                                                      | ↑  |
| <b>BP6</b> | Supporting | Reputable source recently reports variant as benign but the evidence is not available to the laboratory to perform an independent evaluation                                                               | ↑↑ |
| <b>BP7</b> | Supporting | A synonymous (silent) variant for which splicing prediction algorithms predict no impact to the splice consensus sequence nor the creation of a new splice site AND the nucleotide is not highly conserved | ↑↑ |

\* The relevance in ALS was previously described [7]. ↑↑: criteria with a more relevant impact in ALS patients. ↑: less related criteria for the classification of the ALS variants. ↑/X: criteria for which precautions should be considered
