# Supplementary material for: SOD-1 Variants in Amyotrophic Lateral Sclerosis: Systematic Re-Evaluation According to ACMG-AMP Guidelines
Source: MDPI journal article supplement (doi:10.3390/genes13030537), 2022-03-18
Supplement: s1 [file s1]

**Supplementary Table S2.** Assessment of the PM1 criterion in *SOD1* variants.

| Coding change<br>(NM_000454.5) | Protein change<br>(NP_000445.1) | Variant ID   | PM1_Strong                                                                              | PM1_Moderate                                                                            | PM1_Supporting |
|--------------------------------|---------------------------------|--------------|-----------------------------------------------------------------------------------------|-----------------------------------------------------------------------------------------|----------------|
| <b>c.13G&gt;A</b>              | p.Ala5Thr                       | rs121912444  |                                                                                         | 13 missense/in-frame/non-synonymous variants (11 pathogenic, 2 uncertain, and 0 benign) |                |
| <b>c.13G&gt;T</b>              | p.Ala5Ser                       | rs121912444  |                                                                                         | 13 missense/in-frame/non-synonymous variants (11 pathogenic, 2 uncertain, and 0 benign) |                |
| <b>c.13_14delGCinsTT</b>       | p.Ala5Phe                       |              |                                                                                         | 13 missense/in-frame/non-synonymous variants (11 pathogenic, 2 uncertain, and 0 benign) |                |
| <b>c.14C&gt;T</b>              | p.Ala5Val                       | rs121912442  |                                                                                         | 13 missense/in-frame/non-synonymous variants (11 pathogenic, 2 uncertain, and 0 benign) |                |
| <b>c.16G&gt;T</b>              | p.Val6Leu                       | rs1568807314 |                                                                                         | 13 missense/in-frame/non-synonymous variants (11 pathogenic, 2 uncertain, and 0 benign) |                |
| <b>c.19T&gt;A</b>              | p.Cys7Ser                       | rs1312702973 |                                                                                         | 15 missense/in-frame/non-synonymous variants (13 pathogenic, 2 uncertain, and 0 benign) |                |
| <b>c.19T&gt;G</b>              | p.Cys7Gly                       | rs1312702973 |                                                                                         | 15 missense/in-frame/non-synonymous variants (13 pathogenic, 2 uncertain, and 0 benign) |                |
| <b>c.20G&gt;A</b>              | p.Cys7Tyr                       | rs121912448  |                                                                                         | 15 missense/in-frame/non-synonymous variants (13 pathogenic, 2 uncertain, and 0 benign) |                |
| <b>c.21C&gt;G</b>              | p.Cys7Trp                       |              |                                                                                         | 15 missense/in-frame/non-synonymous variants (13 pathogenic, 2 uncertain, and 0 benign) |                |
| <b>c.23T&gt;A</b>              | p.Val8Glu                       | rs1568807330 |                                                                                         | 15 missense/in-frame/non-synonymous variants (13 pathogenic, 2 uncertain, and 0 benign) |                |
| <b>c.25C&gt;G</b>              | p.Leu9Val                       | rs1568807333 | 17 missense/in-frame/non-synonymous variants (15 pathogenic, 2 uncertain, and 0 benign) |                                                                                         |                |
| <b>c.26T&gt;A</b>              | p.Leu9Gln                       | rs1568807342 | 17 missense/in-frame/non-synonymous variants (15 pathogenic, 2 uncertain, and 0 benign) |                                                                                         |                |
| <b>c.31G&gt;C</b>              | p.Gly11Arg                      | rs1568807350 | 18 missense/in-frame/non-synonymous variants (15 pathogenic, 3 uncertain, and 0 benign) |                                                                                         |                |

|                      |            |              |                                                                                         |                                                                                          |  |
|----------------------|------------|--------------|-----------------------------------------------------------------------------------------|------------------------------------------------------------------------------------------|--|
| <b>c.32G&gt;C</b>    | p.Gly11Ala | rs1555836167 | 18 missense/in-frame/non-synonymous variants (15 pathogenic, 3 uncertain, and 0 benign) |                                                                                          |  |
| <b>c.34G&gt;T</b>    | p.Asp12Tyr | rs762628133  | 19 missense/in-frame/non-synonymous variants (15 pathogenic, 4 uncertain, and 0 benign) |                                                                                          |  |
| <b>c.35A&gt;C</b>    | p.Asp12Ala | rs1568807374 | 19 missense/in-frame/non-synonymous variants (15 pathogenic, 4 uncertain, and 0 benign) |                                                                                          |  |
| <b>c.37G&gt;C</b>    | p.Gly13Arg | rs121912456  |                                                                                         | 19 missense/in-frame/non-synonymous variants (15 pathogenic, 4 uncertain, and 0 benign)  |  |
| <b>c.43G&gt;A</b>    | p.Val15Met | rs1568807400 |                                                                                         | 19 missense/in-frame/non-synonymous variants (14 pathogenic, 5 uncertain, and 0 benign)  |  |
| <b>c.44T&gt;C</b>    | p.Val15Ala | rs1202989817 |                                                                                         | 19 missense/in-frame/non-synonymous variants (14 pathogenic, 5 uncertain, and 0 benign)  |  |
| <b>c.44T&gt;G</b>    | p.Val15Gly | rs1202989817 |                                                                                         | 19 missense/in-frame/non-synonymous variants (14 pathogenic, 5 uncertain, and 0 benign)  |  |
| <b>c.49G&gt;A</b>    | p.Gly17Ser | rs121912453  |                                                                                         | 17 missense/in-frame/non-synonymous variants (12 pathogenic, 5 uncertain, and 0 benign)  |  |
| <b>c.50G&gt;C</b>    | p.Gly17Ala | rs1200906022 |                                                                                         | 17 missense/in-frame/non-synonymous variants (12 pathogenic, 5 uncertain, and 0 benign)  |  |
| <b>c.56_58delTCA</b> | p.Ile19del |              |                                                                                         | 16 missense/in-frame/non-synonymous variants (11 pathogenic, 5 uncertain, and 0 benign)  |  |
| <b>c.59A&gt;G</b>    | p.Asn20Ser | rs768029813  |                                                                                         | 15 missense/in-frame/non-synonymous variants (10 pathogenic, 5 uncertain, and 0 benign), |  |
| <b>c.62T&gt;G</b>    | p.Phe21Cys | rs1555836169 |                                                                                         | 14 missense/in-frame/non-synonymous variants (9 pathogenic, 5 uncertain, and 0 benign)   |  |
| <b>c.63C&gt;G</b>    | p.Phe21Leu | rs1555836170 |                                                                                         | 12 missense/in-frame/non-synonymous variants (8 pathogenic, 4 uncertain, and 0 benign)   |  |
| <b>c.64G&gt;A</b>    | p.Glu22Lys | rs121912450  |                                                                                         | 12 missense/in-frame/non-synonymous variants (8 pathogenic, 4 uncertain, and 0 benign)   |  |

|                    |            |              |  |                                                                                         |                                                                                       |
|--------------------|------------|--------------|--|-----------------------------------------------------------------------------------------|---------------------------------------------------------------------------------------|
| <b>c.65A&gt;G</b>  | p.Glu22Gly | rs1568807435 |  | 11 missense/in-frame/non-synonymous variants (8 pathogenic, 3 uncertain, and 0 benign)  |                                                                                       |
| <b>c.66G&gt;C</b>  | p.Glu22Asp |              |  | 11 missense/in-frame/non-synonymous variants (8 pathogenic, 3 uncertain, and 0 benign)  |                                                                                       |
| <b>c.68A&gt;T</b>  | p.Gln23Leu | rs1169198442 |  | 11 missense/in-frame/non-synonymous variants (8 pathogenic, 3 uncertain, and 0 benign)  |                                                                                       |
| <b>c.68A&gt;G</b>  | p.Gln23Arg | rs1169198442 |  | 11 missense/in-frame/non-synonymous variants (8 pathogenic, 3 uncertain, and 0 benign)  |                                                                                       |
| <b>c.69G&gt;C</b>  | p.Gln23His | rs1424217272 |  | 10 missense/in-frame/non-synonymous variants (7 pathogenic, 3 uncertain, and 0 benign)  |                                                                                       |
| <b>c.95T&gt;C</b>  | p.Val32Ala | rs1428716759 |  |                                                                                         | 8 missense/in-frame/non-synonymous variants (5 pathogenic, 3 uncertain, and 0 benign) |
| <b>c.95T&gt;G</b>  | p.Val32Gly | rs1428716759 |  |                                                                                         | 8 missense/in-frame/non-synonymous variants (5 pathogenic, 3 uncertain, and 0 benign) |
| <b>c.112G&gt;A</b> | p.Gly38Arg | rs121912431  |  | 13 missense/in-frame/non-synonymous variants (9 pathogenic, 4 uncertain, and 0 benign)  |                                                                                       |
| <b>c.112G&gt;C</b> | p.Gly38Arg | rs121912431  |  | 13 missense/in-frame/non-synonymous variants (9 pathogenic, 4 uncertain, and 0 benign)  |                                                                                       |
| <b>c.113G&gt;T</b> | p.Gly38Val | rs1555836517 |  | 12 missense/in-frame/non-synonymous variants (9 pathogenic, 3 uncertain, and 0 benign)  |                                                                                       |
| <b>c.115C&gt;G</b> | p.Leu39Val | rs121912432  |  | 13 missense/in-frame/non-synonymous variants (10 pathogenic, 3 uncertain, and 0 benign) |                                                                                       |
| <b>c.116T&gt;A</b> | p.Leu39Gln | rs1555836520 |  | 13 missense/in-frame/non-synonymous variants (10 pathogenic, 3 uncertain, and 0 benign) |                                                                                       |
| <b>c.116T&gt;G</b> | p.Leu39Arg | rs1555836520 |  | 13 missense/in-frame/non-synonymous variants (10 pathogenic, 3 uncertain, and 0 benign) |                                                                                       |
| <b>c.116T&gt;C</b> | p.Leu39Pro |              |  | 13 missense/in-frame/non-synonymous variants (10 pathogenic, 3 uncertain, and 0 benign) |                                                                                       |

|                    |            |              |  |                                                                                          |  |
|--------------------|------------|--------------|--|------------------------------------------------------------------------------------------|--|
| <b>c.122A&gt;G</b> | p.Glu41Gly | rs1568809149 |  | 15 missense/in-frame/non-synonymous variants (11 pathogenic, 4 uncertain, and 0 benign)  |  |
| <b>c.123A&gt;T</b> | p.Glu41Asp |              |  | 15 missense/in-frame/non-synonymous variants (12 pathogenic, 3 uncertain, and 0 benign)  |  |
| <b>c.124G&gt;A</b> | p.Gly42Ser | rs121912433  |  | 15 missense/in-frame/non-synonymous variants (12 pathogenic, 3 uncertain, and 0 benign)  |  |
| <b>c.125G&gt;A</b> | p.Gly42Asp | rs121912434  |  | 15 missense/in-frame/non-synonymous variants (12 pathogenic, 3 uncertain, and 0 benign)  |  |
| <b>c.131A&gt;G</b> | p.His44Arg | rs121912435  |  | 15 missense/in-frame/non-synonymous variants (12 pathogenic, 3 uncertain, and 0 benign)  |  |
| <b>c.137T&gt;C</b> | p.Phe46Ser | rs121912457  |  | 14 missense/in-frame/non-synonymous variants (12 pathogenic, 2 uncertain, and 0 benign)  |  |
| <b>c.137T&gt;G</b> | p.Phe46Cys | rs121912457  |  | 14 missense/in-frame/non-synonymous variants (12 pathogenic, 2 uncertain, and 0 benign)  |  |
| <b>c.139C&gt;G</b> | p.His47Asp | rs748897491  |  | 13 missense/in-frame/non-synonymous variants (11 pathogenic, 2 uncertain, and 0 benign)  |  |
| <b>c.140A&gt;G</b> | p.His47Arg | rs121912443  |  | 13 missense/in-frame/non-synonymous variants (11 pathogenic, 2 uncertain, and 0 benign), |  |
| <b>c.142G&gt;T</b> | p.Val48Phe | rs1555836523 |  | 11 missense/in-frame/non-synonymous variants (9 pathogenic, 2 uncertain, and 0 benign)   |  |
| <b>c.143T&gt;C</b> | p.Val48Ala | rs1568809169 |  | 11 missense/in-frame/non-synonymous variants (9 pathogenic, 2 uncertain, and 0 benign)   |  |
| <b>c.146A&gt;G</b> | p.His49Arg | rs1568809172 |  | 11 missense/in-frame/non-synonymous variants (9 pathogenic, 2 uncertain, and 0 benign)   |  |
| <b>c.147T&gt;G</b> | p.His49Gln | rs1568809175 |  | 11 missense/in-frame/non-synonymous variants (9 pathogenic, 2 uncertain, and 0 benign)   |  |
| <b>c.148G&gt;A</b> | p.Glu50Lys | rs1568809178 |  | 10 missense/in-frame/non-synonymous variants (9 pathogenic, 1 uncertain, and 0 benign)   |  |

|                    |            |              |  |                                                                                                           |                                                                                       |
|--------------------|------------|--------------|--|-----------------------------------------------------------------------------------------------------------|---------------------------------------------------------------------------------------|
| <b>c.164C&gt;G</b> | p.Thr55Arg | rs986277034  |  |                                                                                                           | 6 missense/in-frame/non-synonymous variants (5 pathogenic, 1 uncertain, and 0 benign) |
| <b>c.172T&gt;C</b> | p.Cys58Arg | rs1568810255 |  |                                                                                                           | 6 missense/in-frame/non-synonymous variants (5 pathogenic, 1 uncertain, and 0 benign) |
| <b>c.172T&gt;G</b> | p.Cys58Gly |              |  |                                                                                                           | 6 missense/in-frame/non-synonymous variants (5 pathogenic, 1 uncertain, and 0 benign) |
| <b>c.179G&gt;A</b> | p.Ser60Asn | rs1413388444 |  |                                                                                                           | 6 missense/in-frame/non-synonymous variants (6 pathogenic, 0 uncertain, and 0 benign) |
| <b>c.179G&gt;T</b> | p.Ser60Ile | rs1413388444 |  |                                                                                                           | 6 missense/in-frame/non-synonymous variants (6 pathogenic, 0 uncertain, and 0 benign) |
| <b>c.184G&gt;C</b> | p.Gly62Arg | rs1568810268 |  | 7 missense/in-frame/non-synonymous variants (7 pathogenic, 0 uncertain, and 0 benign)                     |                                                                                       |
| <b>c.193T&gt;C</b> | p.Phe65Leu | rs1030039318 |  | 10 missense/in-frame/non-synonymous variants (9 pathogenic, 1 uncertain, and 0 benign)                    |                                                                                       |
| <b>c.197A&gt;G</b> | p.Asn66Ser | rs1568810275 |  | 11 missense/in-frame/non-synonymous variants (9 pathogenic, 2 uncertain, and 0 benign)                    |                                                                                       |
| <b>c.199C&gt;G</b> | p.Pro67Ala | rs1356474292 |  | 11 missense/in-frame/non-synonymous variants (9 pathogenic, 2 uncertain, and 0 benign)                    |                                                                                       |
| <b>c.199C&gt;T</b> | p.Pro67Ser | rs1356474292 |  | 11 missense/in-frame/non-synonymous variants (9 pathogenic, 2 uncertain, and 0 benign)                    |                                                                                       |
| <b>c.199G&gt;C</b> | p.Pro67Ala | rs1356474292 |  | 17 amino-acids has 11 missense/in-frame/non-synonymous variants (9 pathogenic, 2 uncertain, and 0 benign) |                                                                                       |
| <b>c.200C&gt;G</b> | p.Pro67Arg | rs1568810284 |  | 11 missense/in-frame/non-synonymous variants (9 pathogenic, 2 uncertain, and 0 benign),                   |                                                                                       |
| <b>c.203T&gt;C</b> | p.Leu68Pro | rs1568810289 |  | 11 missense/in-frame/non-synonymous variants (9 pathogenic, 2 uncertain, and 0 benign)                    |                                                                                       |
| <b>c.203T&gt;G</b> | p.Leu68Arg | rs1568810289 |  | 11 missense/in-frame/non-synonymous variants (9 pathogenic, 2 uncertain, and 0 benign)                    |                                                                                       |

|                    |            |              |                                                                                         |                                                                                         |                                                                                       |
|--------------------|------------|--------------|-----------------------------------------------------------------------------------------|-----------------------------------------------------------------------------------------|---------------------------------------------------------------------------------------|
| <b>c.215A&gt;C</b> | p.His72Pro |              |                                                                                         | 13 missense/in-frame/non-synonymous variants (11 pathogenic, 2 uncertain, and 0 benign) |                                                                                       |
| <b>c.217G&gt;A</b> | p.Gly73Ser | rs121912455  |                                                                                         | 13 missense/in-frame/non-synonymous variants (11 pathogenic, 2 uncertain, and 0 benign) |                                                                                       |
| <b>c.217G&gt;T</b> | p.Gly73Cys | rs121912455  |                                                                                         | 13 missense/in-frame/non-synonymous variants (11 pathogenic, 2 uncertain, and 0 benign) |                                                                                       |
| <b>c.218G&gt;A</b> | p.Gly73Asp |              |                                                                                         | 13 missense/in-frame/non-synonymous variants (11 pathogenic, 2 uncertain, and 0 benign) |                                                                                       |
| <b>c.223C&gt;T</b> | p.Pro75Ser |              |                                                                                         | 10 missense/in-frame/non-synonymous variants (8 pathogenic, 2 uncertain, and 0 benign)  |                                                                                       |
| <b>c.224C&gt;G</b> | p.Pro75Arg |              |                                                                                         | 10 missense/in-frame/non-synonymous variants (8 pathogenic, 2 uncertain, and 0 benign)  |                                                                                       |
| <b>c.229G&gt;T</b> | p.Asp77Tyr | rs1601157750 |                                                                                         |                                                                                         | 7 missense/in-frame/non-synonymous variants (5 pathogenic, 2 uncertain, and 0 benign) |
| <b>c.230A&gt;T</b> | p.Asp77Val | rs1568810316 |                                                                                         |                                                                                         | 7 missense/in-frame/non-synonymous variants (5 pathogenic, 2 uncertain, and 0 benign) |
| <b>c.230A&gt;G</b> | p.Asp77Gly |              |                                                                                         |                                                                                         | 7 missense/in-frame/non-synonymous variants (5 pathogenic, 2 uncertain, and 0 benign) |
| <b>c.241C&gt;T</b> | p.His81Tyr |              |                                                                                         | 10 missense/in-frame/non-synonymous variants (10 pathogenic, 0 uncertain, and 0 benign) |                                                                                       |
| <b>c.242A&gt;G</b> | p.His81Arg | rs121912458  |                                                                                         | 10 missense/in-frame/non-synonymous variants (10 pathogenic, 0 uncertain, and 0 benign) |                                                                                       |
| <b>c.250G&gt;A</b> | p.Asp84Asn | rs1555836789 |                                                                                         | 15 missense/in-frame/non-synonymous variants (14 pathogenic, 1 uncertain, and 0 benign) |                                                                                       |
| <b>c.251A&gt;T</b> | p.Asp84Val |              | 15 missense/in-frame/non-synonymous variants (14 pathogenic, 1 uncertain, and 0 benign) |                                                                                         |                                                                                       |
| <b>c.251A&gt;G</b> | p.Asp84Gly | rs1568810615 |                                                                                         | 15 missense/in-frame/non-synonymous variants (14 pathogenic, 1 uncertain, and 0 benign) |                                                                                       |

|                    |            |              |                                                                                         |                                                                                         |  |
|--------------------|------------|--------------|-----------------------------------------------------------------------------------------|-----------------------------------------------------------------------------------------|--|
| <b>c.253T&gt;G</b> | p.Leu85Val | rs121912452  |                                                                                         | 15 missense/in-frame/non-synonymous variants (14 pathogenic, 1 uncertain, and 0 benign) |  |
| <b>c.255G&gt;C</b> | p.Leu85Phe | rs1315541036 | 17 missense/in-frame/non-synonymous variants (16 pathogenic, 1 uncertain, and 0 benign) |                                                                                         |  |
| <b>c.255G&gt;T</b> | p.Leu85Phe |              | 17 missense/in-frame/non-synonymous variants (16 pathogenic, 1 uncertain, and 0 benign) |                                                                                         |  |
| <b>c.256G&gt;A</b> | p.Gly86Ser | rs121912436  | 20 missense/in-frame/non-synonymous variants (19 pathogenic, 1 uncertain, and 0 benign) |                                                                                         |  |
| <b>c.256G&gt;C</b> | p.Gly86Arg | rs121912436  | 20 missense/in-frame/non-synonymous variants (19 pathogenic, 1 uncertain, and 0 benign) |                                                                                         |  |
| <b>c.259A&gt;G</b> | p.Asn87Asp | rs1555836792 | 20 missense/in-frame/non-synonymous variants (19 pathogenic, 1 uncertain, and 0 benign) |                                                                                         |  |
| <b>c.260A&gt;G</b> | p.Asn87Ser | rs11556620   | 20 missense/in-frame/non-synonymous variants (19 pathogenic, 1 uncertain, and 0 benign) |                                                                                         |  |
| <b>c.260A&gt;T</b> | p.Asn87Ile | rs11556620   | 20 missense/in-frame/non-synonymous variants (19 pathogenic, 1 uncertain, and 0 benign) |                                                                                         |  |
| <b>c.261T&gt;A</b> | p.Asn87Lys | rs1555836793 | 20 missense/in-frame/non-synonymous variants (19 pathogenic, 1 uncertain, and 0 benign) |                                                                                         |  |
| <b>c.262G&gt;A</b> | p.Val88Met | rs1568810641 | 21 missense/in-frame/non-synonymous variants (20 pathogenic, 1 uncertain, and 0 benign) |                                                                                         |  |
| <b>c.263T&gt;C</b> | p.Val88Ala | rs1339283341 | 21 missense/in-frame/non-synonymous variants (20 pathogenic, 1 uncertain, and 0 benign) |                                                                                         |  |
| <b>c.268G&gt;A</b> | p.Ala90Thr | rs1568810660 | 22 missense/in-frame/non-synonymous variants (20 pathogenic, 2 uncertain, and 0 benign) |                                                                                         |  |
| <b>c.269C&gt;T</b> | p.Ala90Val | rs1280042397 | 22 missense/in-frame/non-synonymous variants (20 pathogenic, 2 uncertain, and 0 benign) |                                                                                         |  |
| <b>c.271G&gt;A</b> | p.Asp91Asn | rs1343616996 | 22 missense/in-frame/non-synonymous variants (20 pathogenic, 2 uncertain, and 0 benign) |                                                                                         |  |

|                        |                     |              |                                                                                         |  |  |
|------------------------|---------------------|--------------|-----------------------------------------------------------------------------------------|--|--|
| <b>c.272A&gt;C</b>     | p.Asp91Ala          | rs80265967   | 22 missense/in-frame/non-synonymous variants (20 pathogenic, 2 uncertain, and 0 benign) |  |  |
| <b>c.272A&gt;T</b>     | p.Asp91Val          | rs80265967   | 22 missense/in-frame/non-synonymous variants (20 pathogenic, 2 uncertain, and 0 benign) |  |  |
| <b>c.272_274dupACA</b> | p.Asp91_Lys92insAsn |              | 23 missense/in-frame/non-synonymous variants (21 pathogenic, 2 uncertain, and 0 benign) |  |  |
| <b>c.280G&gt;A</b>     | p.Gly94Ser          | rs121912437  | 26 missense/in-frame/non-synonymous variants (24 pathogenic, 2 uncertain, and 0 benign) |  |  |
| <b>c.280G&gt;T</b>     | p.Gly94Cys          | rs121912437  | 26 missense/in-frame/non-synonymous variants (24 pathogenic, 2 uncertain, and 0 benign) |  |  |
| <b>c.280G&gt;C</b>     | p.Gly94Arg          | rs121912437  | 26 missense/in-frame/non-synonymous variants (24 pathogenic, 2 uncertain, and 0 benign) |  |  |
| <b>c.281G&gt;A</b>     | p.Gly94Asp          | rs121912438  | 24 missense/in-frame/non-synonymous variants (22 pathogenic, 2 uncertain, and 0 benign) |  |  |
| <b>c.281G&gt;C</b>     | p.Gly94Ala          | rs121912438  | 24 missense/in-frame/non-synonymous variants (22 pathogenic, 2 uncertain, and 0 benign) |  |  |
| <b>c.284T&gt;C</b>     | p.Val95Ala          | rs202198235  | 22 missense/in-frame/non-synonymous variants (20 pathogenic, 2 uncertain, and 0 benign) |  |  |
| <b>c.286G&gt;A</b>     | p.Ala96Thr          | rs1568810686 | 21 missense/in-frame/non-synonymous variants (19 pathogenic, 2 uncertain, and 0 benign) |  |  |
| <b>c.287C&gt;G</b>     | p.Ala96Gly          | rs1568810690 | 21 missense/in-frame/non-synonymous variants (19 pathogenic, 2 uncertain, and 0 benign) |  |  |
| <b>c.287C&gt;T</b>     | p.Ala96Val          | rs1568810690 | 21 missense/in-frame/non-synonymous variants (19 pathogenic, 2 uncertain, and 0 benign) |  |  |
| <b>c.289G&gt;A</b>     | p.Asp97Asn          | rs121912459  | 20 missense/in-frame/non-synonymous variants (18 pathogenic, 2 uncertain, and 0 benign) |  |  |
| <b>c.290A&gt;T</b>     | p.Asp97Val          | rs1555836803 | 20 missense/in-frame/non-synonymous variants (18 pathogenic, 2 uncertain, and 0 benign) |  |  |



|                    |             |              |                                                                                         |                                                                                         |  |
|--------------------|-------------|--------------|-----------------------------------------------------------------------------------------|-----------------------------------------------------------------------------------------|--|
| <b>c.292G&gt;A</b> | p.Val98Met  | rs1555836806 | 21 missense/in-frame/non-synonymous variants (19 pathogenic, 2 uncertain, and 0 benign) |                                                                                         |  |
| <b>c.292G&gt;C</b> | p.Val98Leu  | rs1555836806 | 21 missense/in-frame/non-synonymous variants (19 pathogenic, 2 uncertain, and 0 benign) |                                                                                         |  |
| <b>c.298A&gt;G</b> | p.Ile100Val | rs760740095  | 18 missense/in-frame/non-synonymous variants (16 pathogenic, 2 uncertain, and 0 benign) |                                                                                         |  |
| <b>c.301G&gt;A</b> | p.Glu101Lys | rs76731700   | 20 missense/in-frame/non-synonymous variants (17 pathogenic, 3 uncertain, and 0 benign) |                                                                                         |  |
| <b>c.301G&gt;C</b> | p.Glu101Gln |              | 20 missense/in-frame/non-synonymous variants (17 pathogenic, 3 uncertain, and 0 benign) |                                                                                         |  |
| <b>c.302A&gt;G</b> | p.Glu101Gly | rs121912439  | 20 missense/in-frame/non-synonymous variants (17 pathogenic, 3 uncertain, and 0 benign) |                                                                                         |  |
| <b>c.304G&gt;A</b> | p.Asp102Asn | rs1568810715 | 21 missense/in-frame/non-synonymous variants (17 pathogenic, 4 uncertain, and 0 benign) |                                                                                         |  |
| <b>c.304G&gt;C</b> | p.Asp102His | rs1568810715 | 21 missense/in-frame/non-synonymous variants (17 pathogenic, 4 uncertain, and 0 benign) |                                                                                         |  |
| <b>c.304G&gt;T</b> | p.Asp102Ty  | rs1568810715 | 21 missense/in-frame/non-synonymous variants (17 pathogenic, 4 uncertain, and 0 benign) |                                                                                         |  |
| <b>c.305A&gt;G</b> | p.Asp102Gly | rs1568810721 | 21 missense/in-frame/non-synonymous variants (17 pathogenic, 4 uncertain, and 0 benign) |                                                                                         |  |
| <b>c.313A&gt;T</b> | p.Ile105Phe | rs121912445  |                                                                                         | 18 missense/in-frame/non-synonymous variants (13 pathogenic, 5 uncertain, and 0 benign) |  |
| <b>c.317C&gt;T</b> | p.Ser106Leu | rs1378590183 |                                                                                         | 18 missense/in-frame/non-synonymous variants (14 pathogenic, 4 uncertain, and 0 benign) |  |
| <b>c.319C&gt;G</b> | p.Leu107Val | rs121912440  | 19 missense/in-frame/non-synonymous variants (15 pathogenic, 4 uncertain, and 0 benign) |                                                                                         |  |
| <b>c.319C&gt;T</b> | p.Leu107Phe | rs121912440  | 19 missense/in-frame/non-synonymous variants (15 pathogenic, 4 uncertain, and 0 benign) |                                                                                         |  |

|                    |             |              |                                                                                         |                                                                                         |  |
|--------------------|-------------|--------------|-----------------------------------------------------------------------------------------|-----------------------------------------------------------------------------------------|--|
| <b>c.326G&gt;A</b> | p.Gly109Glu | rs1359299834 | 21 missense/in-frame/non-synonymous variants (17 pathogenic, 4 uncertain, and 0 benign) |                                                                                         |  |
| <b>c.326G&gt;T</b> | p.Gly109Val | rs1359299834 | 21 missense/in-frame/non-synonymous variants (17 pathogenic, 4 uncertain, and 0 benign) |                                                                                         |  |
| <b>c.328G&gt;T</b> | p.Asp110Tyr | rs567432143  | 20 missense/in-frame/non-synonymous variants (16 pathogenic, 4 uncertain, and 0 benign) |                                                                                         |  |
| <b>c.335G&gt;A</b> | p.Cys112Tyr | rs1601158483 | 19 missense/in-frame/non-synonymous variants (15 pathogenic, 4 uncertain, and 0 benign) |                                                                                         |  |
| <b>c.338T&gt;C</b> | p.Ile113Thr | rs74315452   | 19 missense/in-frame/non-synonymous variants (15 pathogenic, 4 uncertain, and 0 benign) |                                                                                         |  |
| <b>c.339C&gt;G</b> | p.Ile113Met | rs1299542356 |                                                                                         | 18 missense/in-frame/non-synonymous variants (14 pathogenic, 4 uncertain, and 0 benign) |  |
| <b>c.340A&gt;T</b> | p.Ile114Phe | rs1568810780 |                                                                                         | 18 missense/in-frame/non-synonymous variants (14 pathogenic, 4 uncertain, and 0 benign) |  |
| <b>c.341T&gt;C</b> | p.Ile114Thr | rs121912441  |                                                                                         | 18 missense/in-frame/non-synonymous variants (14 pathogenic, 4 uncertain, and 0 benign) |  |
| <b>c.344G&gt;C</b> | p.Gly115Ala | rs1568810789 |                                                                                         | 17 missense/in-frame/non-synonymous variants (13 pathogenic, 4 uncertain, and 0 benign) |  |
| <b>c.346C&gt;G</b> | p.Arg116Gly | rs1301635320 |                                                                                         | 15 missense/in-frame/non-synonymous variants (12 pathogenic, 3 uncertain, and 0 benign) |  |
| <b>c.346C&gt;T</b> | p.Arg116Cys | rs1301635320 |                                                                                         | 15 missense/in-frame/non-synonymous variants (12 pathogenic, 3 uncertain, and 0 benign) |  |
| <b>c.350C&gt;G</b> | p.Thr117Arg | rs1568810800 |                                                                                         | 15 missense/in-frame/non-synonymous variants (12 pathogenic, 3 uncertain, and 0 benign) |  |
| <b>c.352C&gt;G</b> | p.Leu118Val | rs199474723  |                                                                                         | 13 missense/in-frame/non-synonymous variants (11 pathogenic, 2 uncertain, and 0 benign) |  |
| <b>c.355G&gt;C</b> | p.Val119Leu | rs1235629842 |                                                                                         | 12 missense/in-frame/non-synonymous variants (11 pathogenic, 1 uncertain, and 0 benign) |  |

|                    |             |              |  |                                                                                         |  |
|--------------------|-------------|--------------|--|-----------------------------------------------------------------------------------------|--|
| <b>c.355G&gt;T</b> | p.Val119Leu | rs1235629842 |  | 12 missense/in-frame/non-synonymous variants (11 pathogenic, 1 uncertain, and 0 benign) |  |
| <b>c.355G&gt;A</b> | p.Val119Met |              |  | 12 missense/in-frame/non-synonymous variants (11 pathogenic, 1 uncertain, and 0 benign) |  |
| <b>c.358G&gt;T</b> | p.Val120Phe |              |  | 12 missense/in-frame/non-synonymous variants (11 pathogenic, 1 uncertain, and 0 benign) |  |
| <b>c.358G&gt;C</b> | p.Val120Leu | rs1457889952 |  | 9 missense/in-frame/non-synonymous variants (7 pathogenic, 2 uncertain, and 0 benign)   |  |
| <b>c.361C&gt;A</b> | p.His121Asn |              |  | 9 missense/in-frame/non-synonymous variants (7 pathogenic, 2 uncertain, and 0 benign)   |  |
| <b>c.362A&gt;T</b> | p.His121Leu | rs1410925719 |  | 13 missense/in-frame/non-synonymous variants (11 pathogenic, 2 uncertain, and 0 benign) |  |
| <b>c.374A&gt;C</b> | p.Asp125Ala | rs1568811366 |  | 11 missense/in-frame/non-synonymous variants (8 pathogenic, 3 uncertain, and 0 benign)  |  |
| <b>c.374A&gt;T</b> | p.Asp125Val | rs1568811366 |  | 11 missense/in-frame/non-synonymous variants (8 pathogenic, 3 uncertain, and 0 benign)  |  |
| <b>c.376G&gt;C</b> | p.Asp126His | rs1568811372 |  | 12 missense/in-frame/non-synonymous variants (9 pathogenic, 3 uncertain, and 0 benign)  |  |
| <b>c.376G&gt;A</b> | p.Asp126Asn |              |  | 12 missense/in-frame/non-synonymous variants (9 pathogenic, 3 uncertain, and 0 benign)  |  |
| <b>c.377A&gt;C</b> |             | rs1164911383 |  | 12 missense/in-frame/non-synonymous variants (9 pathogenic, 3 uncertain, and 0 benign)  |  |
| <b>c.380T&gt;C</b> | p.Leu127Ser | rs121912454  |  | 13 missense/in-frame/non-synonymous variants (10 pathogenic, 3 uncertain, and 0 benign) |  |
| <b>c.382G&gt;C</b> | p.Gly128Arg | rs1568811389 |  | 13 missense/in-frame/non-synonymous variants (10 pathogenic, 3 uncertain, and 0 benign) |  |
| <b>c.385A&gt;G</b> | p.Lys129Glu |              |  | 12 missense/in-frame/non-synonymous variants (9 pathogenic, 3 uncertain, and 0 benign)  |  |

|                    |             |              |                                                                                         |                                                                                         |  |
|--------------------|-------------|--------------|-----------------------------------------------------------------------------------------|-----------------------------------------------------------------------------------------|--|
| <b>c.400G&gt;A</b> | p.Glu134Lys |              |                                                                                         | 15 missense/in-frame/non-synonymous variants (11 pathogenic, 4 uncertain, and 0 benign) |  |
| <b>c.401A&gt;T</b> | p.Glu134Val | rs1568811426 |                                                                                         | 15 missense/in-frame/non-synonymous variants (11 pathogenic, 4 uncertain, and 0 benign) |  |
| <b>c.403A&gt;G</b> | p.Ser135Gly | rs1555836932 |                                                                                         | 12 missense/in-frame/non-synonymous variants (8 pathogenic, 4 uncertain, and 0 benign)  |  |
| <b>c.404G&gt;A</b> | p.Ser135Asn | rs121912451  |                                                                                         | 12 missense/in-frame/non-synonymous variants (8 pathogenic, 4 uncertain, and 0 benign)  |  |
| <b>c.404G&gt;C</b> | p.Ser135Thr | rs121912451  |                                                                                         | 12 missense/in-frame/non-synonymous variants (8 pathogenic, 4 uncertain, and 0 benign)  |  |
| <b>c.412A&gt;G</b> | p.Thr138Ala | rs1568811445 |                                                                                         | 16 missense/in-frame/non-synonymous variants (12 pathogenic, 4 uncertain, and 0 benign) |  |
| <b>c.413C&gt;G</b> | p.Thr138Arg | rs1568811454 |                                                                                         | 16 missense/in-frame/non-synonymous variants (12 pathogenic, 4 uncertain, and 0 benign) |  |
| <b>c.416G&gt;A</b> | p.Gly139Glu | rs1568811464 |                                                                                         | 17 missense/in-frame/non-synonymous variants (13 pathogenic, 4 uncertain, and 0 benign) |  |
| <b>c.418A&gt;C</b> | p.Asn140His | rs1568811471 | 19 missense/in-frame/non-synonymous variants (15 pathogenic, 4 uncertain, and 0 benign) |                                                                                         |  |
| <b>c.418A&gt;G</b> | p.Asn140Asp | rs1568811471 | 19 missense/in-frame/non-synonymous variants (15 pathogenic, 4 uncertain, and 0 benign) |                                                                                         |  |
| <b>c.420C&gt;A</b> | p.Asn140Lys | rs1804449    | 20 missense/in-frame/non-synonymous variants (16 pathogenic, 4 uncertain, and 0 benign) |                                                                                         |  |
| <b>c.422C&gt;G</b> | p.Ala141Gly | rs1555836937 | 21 missense/in-frame/non-synonymous variants (16 pathogenic, 5 uncertain, and 0 benign) |                                                                                         |  |
| <b>c.424G&gt;A</b> | p.Gly142Arg |              | 23 missense/in-frame/non-synonymous variants (17 pathogenic, 6 uncertain, and 0 benign) |                                                                                         |  |
| <b>c.425G&gt;A</b> | p.Gly142Glu | rs1568811489 | 22 missense/in-frame/non-synonymous variants (17 pathogenic, 5 uncertain, and 0 benign) |                                                                                         |  |

|                    |             |              |                                                                                         |                                                                                         |  |
|--------------------|-------------|--------------|-----------------------------------------------------------------------------------------|-----------------------------------------------------------------------------------------|--|
| <b>c.425G&gt;C</b> | p.Gly142Ala | rs1568811489 | 22 missense/in-frame/non-synonymous variants (17 pathogenic, 5 uncertain, and 0 benign) |                                                                                         |  |
| <b>c.434T&gt;C</b> | p.Leu145Ser | rs121912446  | 23 missense/in-frame/non-synonymous variants (16 pathogenic, 7 uncertain, and 0 benign) |                                                                                         |  |
| <b>c.435G&gt;C</b> | p.Leu145Phe | rs1482760341 | 23 missense/in-frame/non-synonymous variants (16 pathogenic, 7 uncertain, and 0 benign) |                                                                                         |  |
| <b>c.436G&gt;A</b> | p.Ala146Thr | rs121912447  | 23 missense/in-frame/non-synonymous variants (16 pathogenic, 7 uncertain, and 0 benign) |                                                                                         |  |
| <b>c.437C&gt;A</b> | p.Ala146Asp | rs1131690781 | 23 missense/in-frame/non-synonymous variants (16 pathogenic, 7 uncertain, and 0 benign) |                                                                                         |  |
| <b>c.437C&gt;G</b> | p.Ala146Gly | rs1131690781 | 23 missense/in-frame/non-synonymous variants (16 pathogenic, 7 uncertain, and 0 benign) |                                                                                         |  |
| <b>c.439T&gt;C</b> | p.Cys147Arg | rs1568811515 | 21 missense/in-frame/non-synonymous variants (15 pathogenic, 6 uncertain, and 0 benign) |                                                                                         |  |
| <b>c.442G&gt;C</b> | p.Gly148Arg | rs1568811520 | 20 missense/in-frame/non-synonymous variants (15 pathogenic, 5 uncertain, and 0 benign) |                                                                                         |  |
| <b>c.442G&gt;A</b> | p.Gly148Ser |              | 20 missense/in-frame/non-synonymous variants (15 pathogenic, 5 uncertain, and 0 benign) |                                                                                         |  |
| <b>c.442G&gt;T</b> | p.Gly148Cys |              | 20 missense/in-frame/non-synonymous variants (15 pathogenic, 5 uncertain, and 0 benign) |                                                                                         |  |
| <b>c.443G&gt;A</b> | p.Gly148Asp | rs1555836950 | 20 missense/in-frame/non-synonymous variants (15 pathogenic, 5 uncertain, and 0 benign) |                                                                                         |  |
| <b>c.445G&gt;A</b> | p.Val149Ile | rs567511139  |                                                                                         | 19 missense/in-frame/non-synonymous variants (14 pathogenic, 5 uncertain, and 0 benign) |  |
| <b>c.446T&gt;G</b> | p.Val149Gly | rs1476760624 |                                                                                         | 17 missense/in-frame/non-synonymous variants (12 pathogenic, 5 uncertain, and 0 benign) |  |
| <b>c.446T&gt;C</b> | p.Val149Ala |              |                                                                                         | 17 missense/in-frame/non-synonymous variants (12 pathogenic, 5 uncertain, and 0 benign) |  |

|                    |             |              |  |                                                                                           |  |
|--------------------|-------------|--------------|--|-------------------------------------------------------------------------------------------|--|
| <b>c.448A&gt;G</b> | p.Ile150Val | rs1169917994 |  | 16 missense/in-frame/ non-synonymous variants (12 pathogenic, 4 uncertain, and 0 benign), |  |
| <b>c.449T&gt;C</b> | p.Ile150Thr | rs1424014997 |  | 16 missense/in-frame/ non-synonymous variants (12 pathogenic, 4 uncertain, and 0 benign), |  |
| <b>c.455T&gt;C</b> | p.Ile152Thr | rs121912449  |  | 16 missense/in-frame/ non-synonymous variants (12 pathogenic, 4 uncertain, and 0 benign   |  |
| <b>c.455T&gt;G</b> | p.Ile152Ser |              |  | 16 missense/in-frame/ non-synonymous variants (12 pathogenic, 4 uncertain, and 0 benign   |  |
| <b>c.457G&gt;A</b> | p.Ala153Thr | rs747094021  |  | 16 missense/in-frame/ non-synonymous variants (12 pathogenic, 4 uncertain, and 0 benign)  |  |
|                    |             |              |  |                                                                                           |  |
