# Supplementary figures and images for: SOD-1 Variants in Amyotrophic Lateral Sclerosis: Systematic Re-Evaluation According to ACMG-AMP Guidelines
Source: MDPI journal article supplement (doi:10.3390/genes13030537), 2022-03-18

**Supplementary Figure S2.** Decision tree for functional evidence PS3.

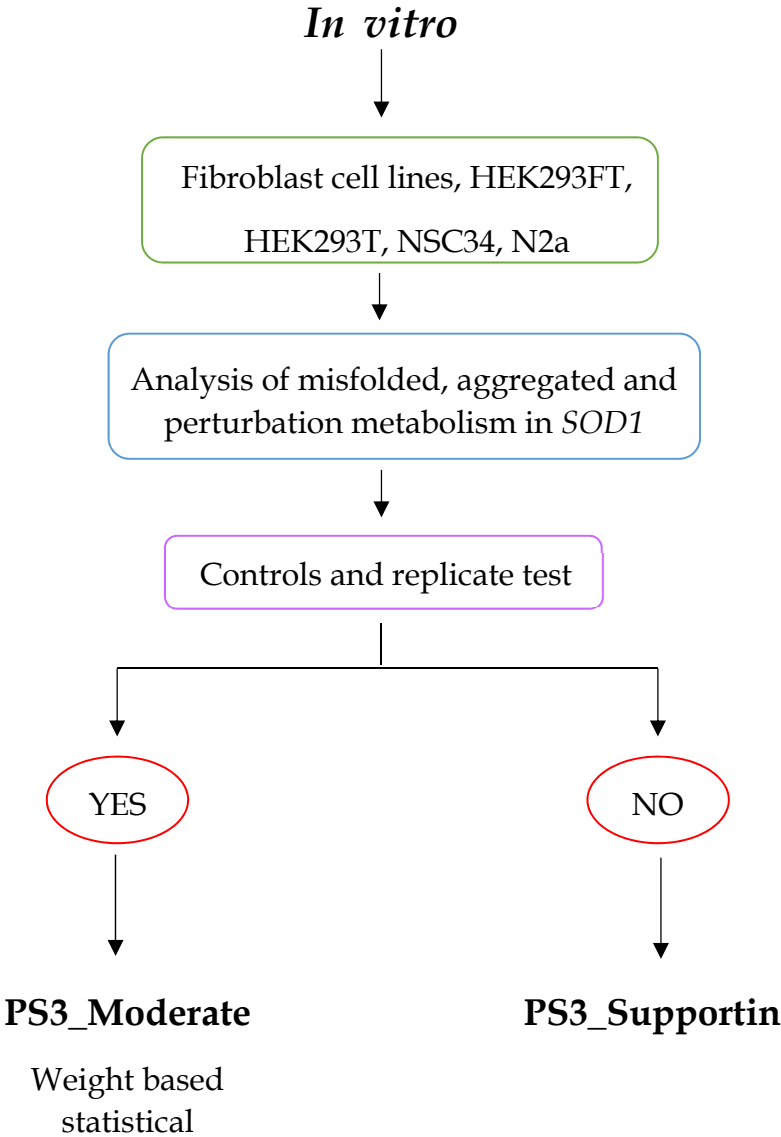

Supplement: s1 [file s1]
